# Supplementary material for: Revisiting conventional noncovalent interactions towards a complete understanding: from tetrel to pnicogen, chalcogen, and halogen bond
Source: RSC Adv. 2023 Oct 27;13(45):31507–17. doi: 10.1039/d3ra06078k (PMC10606978; doi:10.1039/d3ra06078k)
Supplement: RA-013-D3RA06078K-s001 [file RA-013-D3RA06078K-s001.pdf]

## Supporting information

### Revisiting conventional noncovalent interactions towards a complete understanding:

#### From tetrel to pnictogen, chalcogen, and halogen bond

Cam-Tu Phan Dang<sup>1,2\*</sup>, Nguyen Minh Tam<sup>3</sup>, Thanh-Nam Huynh<sup>4</sup>, Nguyen Tien Trung<sup>5</sup>

<sup>1</sup>*Faculty of Natural Sciences, Duy Tan University, Da Nang 550000, Vietnam*

<sup>2</sup>*Institute of Research and Development, Duy Tan University, Da Nang 550000, Vietnam*

<sup>3</sup>*Faculty of Basic Sciences, University of Phan Thiet, 225 Nguyen Thong, Phan Thiet City, Binh Thuan, Viet Nam*

<sup>4</sup>*Institute of Catalysis Research and Technology, Karlsruhe Institute of Technology, Eggenstein-Leopoldshafen 76344 Germany*

<sup>5</sup>*Laboratory of Computational Chemistry and Modelling (LCCM), Quy Nhon University, Quy Nhon City 590000, Vietnam*

\*Corresponding author: [phandcamtu@duytan.edu.vn](mailto:phandcamtu@duytan.edu.vn) / [phancamtu9982@gmail.com.vn](mailto:phancamtu9982@gmail.com.vn)

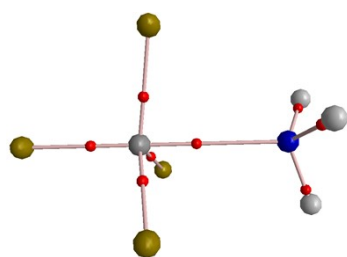

H<sub>3</sub>N-SiF<sub>4</sub> TtB  
(axial)

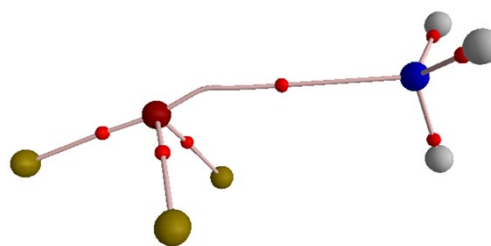

H<sub>3</sub>N-PF<sub>3</sub> PniB

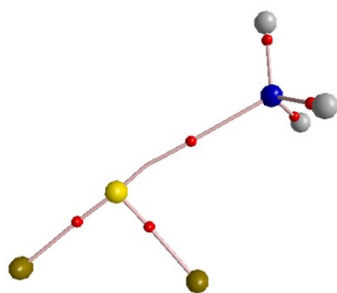

H<sub>3</sub>N-SF<sub>2</sub> ChalB

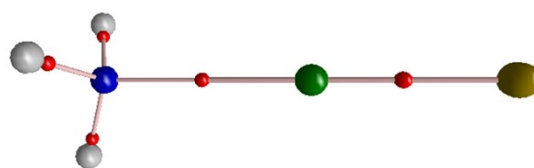

H<sub>3</sub>N-ClF HalB

**Figure S1. Topological graphs with density at MP2/aDZ of investigated complexes**

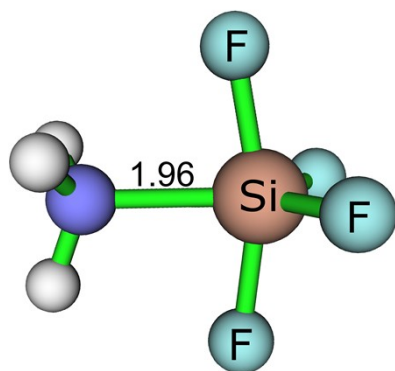

*Equatorial conformer*

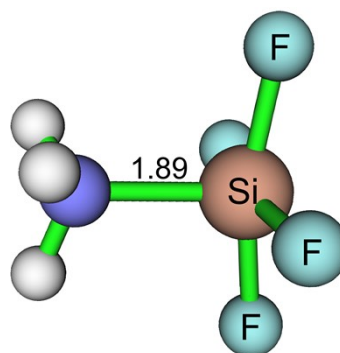

*Square pyramidal conformer*

a) Less stable conformers of  $\text{H}_3\text{N-SiF}_4$  complex at MP2/aTZ

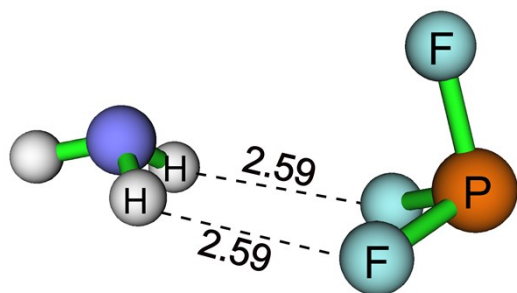

**Conformer II**

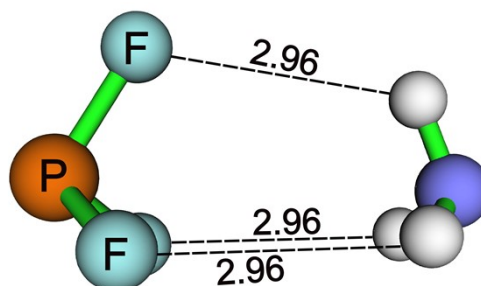

**Conformer III**

b) Less stable hydrogen-bonded conformers of  $\text{H}_3\text{N-PF}_3$  complex at MP2/aTZ

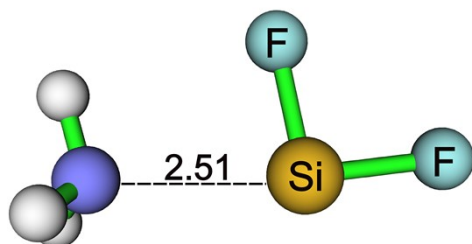

c) *Eclipsed conformer* of  $\text{H}_3\text{N-SF}_2$

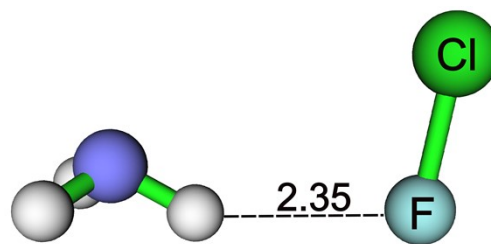

d) Hydrogen bonded-structure of  $\text{H}_3\text{N-ClF}$

**Figure S2. Secondary structures of investigated complexes at MP2/aTZ level**

Two other conformers of  $\text{H}_3\text{N-SiF}_4$ , including *equatorial* and *square pyramidal* geometries, stated by Chehayber *et al.*<sup>1</sup>, were also reoptimized at MP2/aTZ high-level of theory to accurately investigate their stabilities and electronic properties (cf. Figure S2). Their binding energies are positive, 5.10 and 11.92  $\text{kJ}\cdot\text{mol}^{-1}$ , respectively, at MP2/aTZ. Both *equatorial* and *square pyramidal conformer* occur an imaginary frequency of  $-43.14\text{ cm}^{-1}$  and  $-125.83\text{ cm}^{-1}$ .

The *hydrogen-bonded* conformers (**II** and **III**) of  $\text{NH}_3\text{-PF}_3$  both are less stable than  $\text{H}_3\text{N-PF}_3$  PniB one. Indeed, their  $E_b + \text{ZPE} + \text{BSSE}$  values at MP2/aTZ are slightly negative, i.e.  $-0.56$  and  $-1.64\text{ kJ}\cdot\text{mol}^{-1}$ , respectively. The AIM analyses show the conformer **II** exhibits three intermolecular interactions, including a  $\text{PF}\cdots\text{N}$  HalB and two  $\text{NH}\cdots\text{F}$  hydrogen bonds. Their  $\rho(\text{rc})$  values at BCPs are  $1.9 \times 10^{-3}\text{ a.u.}$ ,  $5.8 \times 10^{-3}\text{ a.u.}$ , and  $5.8 \times 10^{-3}\text{ a.u.}$ , respectively; and all significantly lower than that of  $\text{N}\cdots\text{P}$  PniB ( $18.5 \times 10^{-3}\text{ a.u.}$ ). The conformer **III** occurs two imaginary frequencies ( $-49.49$  and  $-49.47\text{ cm}^{-1}$ ) at MP2/aTZ.

The *eclipsed* structure of  $\text{H}_3\text{N-SF}_2$  model exhibits the stabilization energy of  $-21.2\text{ kJ}\cdot\text{mol}^{-1}$  at MP2/aTZ, reasonably approximate to that of the *staggered* one ( $-21.1\text{ kJ}\cdot\text{mol}^{-1}$ ). However, one imaginary frequency is found in the *eclipsed* conformer ( $-57.15\text{ cm}^{-1}$ ), where  $\text{H}_\alpha$  atom of  $\text{NH}_3$  vibrates towards the outside of the  $C_s$  symmetry plane. Thus, the *eclipsed* structure could be recognized as a transition state moving towards the more stable *staggered* conformer.

The  $\text{H}_3\text{N-ClF}$  *hydrogen-bonded* structure exhibits an binding energy of  $-1.38\text{ kJ}\cdot\text{mol}^{-1}$  at MP2/aTZ.

---

1. Chehayber JM, Nagy ST, Lin CS. Ab initio studies of complexes between  $\text{SiF}_4$  and ammonia. *Can J Chem.* 1984;62(1):27-31. doi:10.1139/v84-006

**Table S1.**  $V_{s,min}$  and  $V_{s,max}$  values (kcal.mol<sup>-1</sup>) of isolated monomers derived from Multiwfn at MP2/aTZ

| Isolated monomers | $V_{s,min}$ | $V_{s,max}$ |
|-------------------|-------------|-------------|
| NH <sub>3</sub>   | -37.267252  | 26.530416   |
|                   |             | 26.516305   |
|                   |             | 26.524880   |
| ClF*              | -10.899116  | 47.815127   |
| SF <sub>2</sub>   | -11.484665  | 45.237921   |
|                   | -11.467289  | 45.232004   |
| PF <sub>3</sub>   | -11.311841  | 39.768458   |
|                   | -11.267542  | 39.654171   |
|                   | -11.269485  | 39.613856   |
| SiF <sub>4</sub>  | -9.805767   | 57.264031   |
|                   | -9.776024   | 57.161980   |
|                   | -9.804366   | 56.949983   |
|                   | -9.788675   | 57.243163   |

\* This structure exists maxima points around the F atom, which form a ring in perpendicular to the F-Cl bond

**Table S2. Contribution of different components to interaction energies of noncovalent complexes using high order SAPT2+(3)dMP2 approach (kJ.mol<sup>-1</sup>) at aTZ**

|                                            | <b>SiF<sub>4</sub>-NH<sub>3</sub> TtB</b> | <b>PF<sub>3</sub>-NH<sub>3</sub> PniB</b> | <b>SF<sub>2</sub>-NH<sub>3</sub> ChalB</b> | <b>ClF-NH<sub>3</sub> HalB</b> |
|--------------------------------------------|-------------------------------------------|-------------------------------------------|--------------------------------------------|--------------------------------|
| Electrostatic                              | -330.66                                   | -50.89                                    | -103.60                                    | -162.05                        |
| Induction                                  | -135.79                                   | -13.27                                    | -45.35                                     | -103.41                        |
| Dispersion                                 | -62.00                                    | -19.89                                    | -31.90                                     | -40.28                         |
| Exchange                                   | 402.81                                    | 65.49                                     | 150.34                                     | 257.93                         |
| E <sub>elst</sub> /E <sub>int</sub> (SAPT) | 3.39                                      | 3.40                                      | 2.74                                       | 2.63                           |
| E <sub>ind</sub> /E <sub>int</sub> (SAPT)  | 2.16                                      | 1.49                                      | 0.71                                       | 1.08                           |
| E <sub>disp</sub> /E <sub>int</sub> (SAPT) | 0.84                                      | 1.05                                      | 1.07                                       | 0.49                           |
| E <sub>exch</sub> /E <sub>int</sub> (SAPT) | -5.39                                     | -4.93                                     | -3.53                                      | -3.21                          |
